# Supplementary material for: Interplay of BAF and MLL4 promotes cell type-specific enhancer activation
Source: PubMed Central journal article supplement (PMC7955098; doi:10.1038/s41467-021-21893-y), 2021-03-12
Supplement: 41467_2021_21893_MOESM4_ESM.pdf [file 41467_2021_21893_MOESM4_ESM.pdf]

## **Descriptions of Additional Supplementary Files**

### **Supplementary Data 1**

**Description:** Raw data on MLL4 IP-mass spectrometry. Shown is a full list of MLL4-associated proteins in mouse embryonic stem cells identified by IP-Mass spectrometry.

### **Supplementary Data 2**

**Description:** Raw data on UTX IP-mass spectrometry. Shown is a full list of UTX-associated proteins in mouse embryonic stem cells identified by IP-Mass spectrometry.
